# Supplementary material
Source: publisher figshare collection journal article supplement (https://acs.figshare.com/ndownloader/files/5302687)
Supplement: Supplementary file 1 [file 5302687]

## Supporting Information

### **Cell penetrating peptide-modified gold nanoparticles for the delivery of doxorubicin to brain metastatic breast cancer**

Ramin A. Morshed <sup>1</sup>, Megan E. Muroski <sup>2</sup>, Qing Dai <sup>3</sup>, Michelle L. Wegscheid <sup>1</sup>, Brenda Auffinger <sup>1</sup>, Dou Yu <sup>2</sup>, Yu Han <sup>2</sup>, Lingjiao Zhang <sup>1</sup>, Meijing Wu <sup>2</sup>, Yu Cheng <sup>4,\*</sup>, Maciej S. Lesniak <sup>2,\*</sup>

#### Author Affiliations

<sup>1</sup> The Brain Tumor Center, The University of Chicago, Chicago, IL, USA

<sup>2</sup> Northwestern University Feinberg School of Medicine, 676 N. St Clair Street, Suite 2210, Chicago, IL 60611, USA

<sup>3</sup> Department of Chemistry, Institute of Biophysics Dynamics and Howard Hughes Medical Institute, The University of Chicago, Chicago, IL, USA

<sup>4</sup> Shanghai East Hospital, The Institute for Biomedical Engineering and Nano Science, Tongji University School of Medicine, Shanghai, China

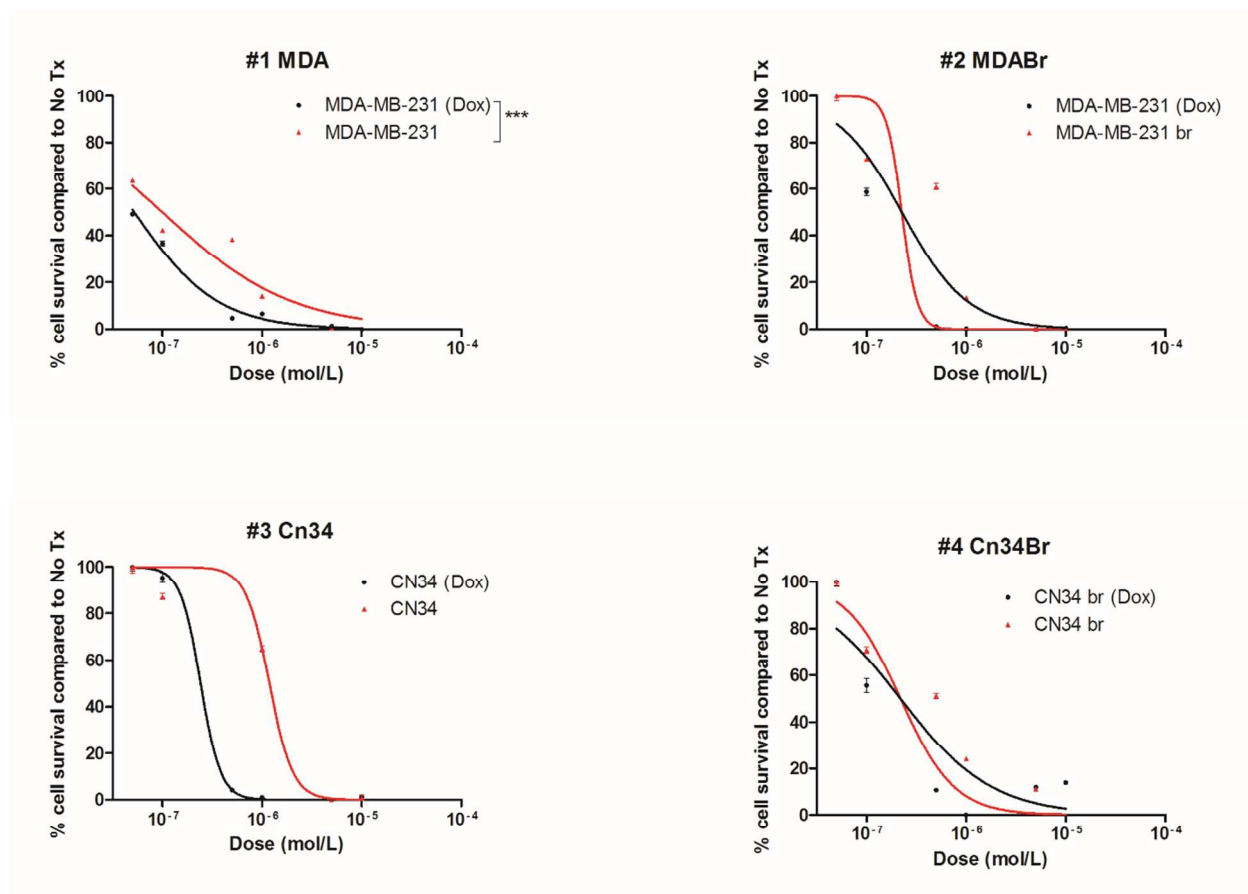

**Supplemental Figure 1.** Treatment with TAT-Au and unconjugated Dox. MTT assay results after 48 h incubation with TAT-Au and unconjugated Dox (red curves) vs. Dox alone (black curves) at concentrations ranging from 0.05–10  $\mu$ M in MDA-MB-231/MDA-MB-231-Br and CN34/CN34-Br (n=4 per condition). There was no improvement in the IC<sub>50</sub> values for TAT-Au and unconjugated Dox compared to free Dox across cell lines.
